# Supplementary material
Source: publisher site journal article supplement (https://www.dovepress.com/article/178049)
Supplement: Supplementary file 1 [file get_supplementary_file.php]

**Supplemental Materials**

Cognitive behavioural therapy for people with chronic obstructive pulmonary disease: Rapid review.

Williams MT, Johnston KN, Paquet C.

**Table S1**: Summary of study characteristics [n=33 ordered by research designs and most recent publication year]

**Table S2:** Summary of experimental studies [ordered by research designs and most recent publication year]

**Table S3 :** Appraisal of methodological quality outcome from PEDro scale

**Sensitivity Analysis**

**Table S4**: Overview of original (RCTs + CCTs) and revised (sensitivity -RCTs only) meta-analysis.

**Table S1: Summary of study characteristics** [n=33 ordered by research designs and most recent publication year]

| First author /year | Country | Design | Health condition | Eligibility included threshold criterion for anxiety or depression | | | | | | | | | | Sample included in analysis  N=  [Male: Female] | Age  Mean [SD] | Program duration [wks] | Outcome reported | | | | |
| --- | --- | --- | --- | --- | --- | --- | --- | --- | --- | --- | --- | --- | --- | --- | --- | --- | --- | --- | --- | --- | --- |
| Criterion | Referral | HADs [Total] | HADS-A | BAI | GAI | STAI-S / STAI-T | BDI | GDS | PHQ-9 | Anxiety | Depression | Breathlessness | Quality of life | Exercise capacity |
| Malpass 2015 57 | UK | Phen | COPD/Asthma | Yes |  | >12 |  |  |  |  |  |  |  | 12 [6:6] | NR | 8 |  |  |  |  |  |
| Cully 2009 56 | USA | CE | COPD/HF | Yes |  |  |  |  |  | >39 | >13 |  |  | 3 [3:0] | 67 [10] | 6 | X | X | X | X |  |
| Stanley 2005 55 | USA | CE | COPD | Yes |  |  |  | ≥16 |  |  | ≥14 |  |  | 5 [5:0] | 63 [10] | 8 | X | X |  | X |  |
| Farver-Vestergaard 2019 54 | Denmark | Cohort | COPD |  |  |  |  |  |  |  |  |  |  | 8 [4:4] | 73 [10] | 8 | X | X |  | X |  |
| Howard 2010 53 | UK | Cohort | COPD |  |  |  |  |  |  |  |  |  |  | 48 [29:19] | 71 [10] | 4 | X | X |  | X |  |
| Cully 2010 52 | USA | Cohort | COPD/HF | Yes |  |  |  |  |  | ≥ 40 | ≥14 |  |  | 23 [22:1] | 71 [8] | 6 | X | X | X | X |  |
| Heslop 2009 51 | UK | Cohort | COPD | Yes | * |  |  |  |  |  |  |  |  | 10 [5:5] | 68 [10] | NR | X | X |  |  |  |
| De Godoy 2009 50 | Brazil | Cohort | COPD |  |  |  |  |  |  |  |  |  |  | 30 [21:9] | 61 [10] | 12 | X | X |  | X | X |
| Lisansky 1996 49 | USA | Cohort | COPD |  |  |  |  |  |  |  |  |  |  | 8 [3:5] | 70 [NR] | 8 | X | X |  |  |  |
| Luk 2017 35 | Australia | CCT | COPD |  |  |  |  |  |  |  |  |  |  | 28 [15:13] | 72 [7] | 8 | X | X | X | X | X |
| Williams 2015 36 | Australia | CCT | COPD |  |  |  |  |  |  |  |  |  |  | 70 [47:23] | 73 [7] | 8 |  |  | X | X | X |
| Eiser 1997 37 | UK | CCT | COPD | Yes |  |  | >8 |  |  |  |  |  |  | 18 [8:12] | 72 [NR] | 6 | X |  | X | X | X |
| Pumer 2019 38 | Australia | RCT | COPD+CRD | Yes |  |  |  |  | ≥3 |  |  | ≥4 |  | 65 [26:39] | 69 [10] | 8 | X | X |  | X | X |
| Farver-Vestergaard 2018 39 | Denmark | RCT | COPD |  |  |  |  |  |  |  |  |  |  | 84 [36:48] | 67 [8] | 8 | X | X | X | X | X |
| Heslop-Marshall 2018 40 | UK | RCT | COPD | Yes |  |  | ⩾8 |  |  |  |  |  |  | 279 [128:151] | 67 [10] | 4-12 | X | X |  | X |  |
| Cully 2017 41 | USA | RCT | COPD/HF | Yes |  |  |  | ≥16 |  |  |  |  | ≥10 | 302 [285:17] | 65 [8] | 16 | X | X | X | X |  |
| Doyle 2017 42 | Australia | RCT | COPD | Yes |  |  | ⩾8 |  |  |  |  |  | ≥10 | 110 [38:72] | 68 [9] | 8 | X | X |  | X |  |
| Bove 2016 43 | Denmark | RCT | COPD | Yes |  |  | ⩾8 |  |  |  |  |  |  | 65 [22:44] | 70 [8] | 3 | X | X | X | X |  |
| Lee 2015 44 | S. Korea | RCT | COPD |  |  |  |  |  |  |  |  |  |  | 151[138:13] | 66[8] | 24 |  | X |  |  |  |
| Howard 2014 45 | UK | RCT | COPD |  |  |  |  |  |  |  |  |  |  | 222 [85:115] | 72 [11] | 5 | X | X | X | X |  |
| Walters 2013 46 | Australia | RCT | COPD |  |  |  |  |  |  |  |  |  |  | 154 [96:86] | 68[8] | 52 | X | X |  | X |  |
| Jiang 2012 22 | China | RCT | COPD |  |  |  |  |  |  |  |  |  |  | 96 [67:29] | 65 [8] | 40 | X | X |  | X |  |
| Jonker 2012 45 | Netherlands | RCT | COPD/Diabetes | Yes |  |  |  |  |  |  |  |  | # | 361 [193:168] | 70 [6] | 12 | X |  |  |  |  |
| Kapella 2011 21 | USA | RCT | COPD |  |  |  |  |  |  |  |  |  |  | 18 [14:4] | 63 [10] | 6 | X | X |  | X |  |
| Lamers 2010 20 | Netherlands | RCT | COPD | Yes |  |  |  |  |  |  |  |  | # | 187 [112:75] | 71 [7] | ≤ 12 | X | X |  | X |  |
| Livermore 2010 19 | Australia | RCT | COPD |  |  |  |  |  |  |  |  |  |  | 41 [18:23] | 73[7] | 4 | X | X | X | X |  |
| Hynninen 2010 18 | Norway | RCT | COPD | Yes |  |  |  | >15 |  |  | >13 |  |  | 51 [25:26] | 61 [8] | 7 | X | X |  | X |  |
| Kunik 2008 17 | USA | RCT | COPD | Yes |  |  |  | ≥16 |  |  | ≥14 |  |  | 238 [226:9] | 66 [10] | 8 | X | X | X | X | X |
| Blumenthal 2006 48 | USA | RCT | COPD +CRD |  |  |  |  |  |  |  |  |  |  | 328 [84:184] | 50 [11] | 12 | X | X | X | X | X |
| De Godoy 2005 16 | Brazil | RCT | COPD |  |  |  |  |  |  |  |  |  |  | 49 [36:13] | NR | 12 | X | X |  | X | X |
| De Godoy 2003 15 | Brazil | RCT | COPD |  |  |  |  |  |  |  |  |  |  | 30 [22:8] | 60 [13] | 12 | X | X |  |  | X |
| Kunik 2001 14 | USA | RCT | COPD |  |  |  |  |  |  |  |  |  |  | 48 [40:8] | 71 [6] | 1 | X | X |  | X | X |
| Emery 1998 13 | USA | RCT | COPD |  |  |  |  |  |  |  |  |  |  | 73 [37:42] | 66 [5] | 10 | X | X |  | X | X |

**Key:** BAI = Beck Anxiety Inventory; BDI = Beck Depression Inventory; CRD =Chronic respiratory disease; CCT= Controlled clinical trial; COPD = Chronic obstructive pulmonary disease; CE = case exemplars; GDS = Geriatric Depression Scale; GAI =Geriatric Anxiety Inventory; HADS-A/D =Hospital Anxiety and Depression scale; HF= heart failure; NR =Not reported; PHQ-9 =Patient Health Questionnaire; Phen = Phenomenological ; RCT = randomised controlled trial; STAI-S /STAI-T = State-Trait Anxiety Inventory. # -patients reporting at least two symptoms of depression; * Referral from treating doctor if anxiety or depression was felt to be significantly affecting symptoms [excluded major depression].

**Table S2: Summary of experimental studies** [ordered by research design and most recent publication year]

| First author | Design | Study Quality (PEDro score) | Program duration [wks] | CBT intervention target | Intensity Active CBT intervention | Number included in analysis | Number of CBT sessions [total] | Frequency (/wk) | Session Duration [mins] | Facilitator | Group or individual | Delivery | | | | | Number of CBT sessions attended mean [SD] or % | Booster session post intervention | Intervention includes additional sessions | | | | Total session in intervention | Comparator intensity | Number included in analysis | Comparator reported to include | | | | Total session in comparator |
| --- | --- | --- | --- | --- | --- | --- | --- | --- | --- | --- | --- | --- | --- | --- | --- | --- | --- | --- | --- | --- | --- | --- | --- | --- | --- | --- | --- | --- | --- | --- |
| Face to Face | Phone | Telemedicine | Manual/print | Audio | Exercise /PR | Education | Print materials | Other | Exercise /PR | Education | Print materials | Other |
| Farver-V 2019 54 | C | - | 8 | A+D | H | 8 | 9 | 1 | ≤60 I + 120 G | CP | I+G |  |  | X | X | X | 7.5 [0.8] |  |  |  |  |  | 9 | - |  |  |  |  |  |  |
| Howard 2010 53 | C | - | 4 | A+B | H | 48 | 4 | 1 | 120 | N, P, PT, OT | G | X |  |  | X | X | 3.6 [0.7] | X |  |  |  |  | 5 | - |  |  |  |  |  |  |
| #Cully 2010 52 | C | - | 6 | A+D | H | 23 | 6 | 1 | 50 | P | I | X | X |  | X |  | 5.0 [2.0] | X |  |  |  |  | 9 | - |  |  |  |  |  |  |
| #Heslop 2009 51 | C | - | V | A+D | H | 10 | 2-13 | V | NR | N, P | I | X |  |  | X |  | 4 [NR] |  |  |  |  |  | ≤ 13 | - |  |  |  |  |  |  |
| De Godoy 2009 50 | C | - | 12 | SM | H | 30 | 12 | 1 | 60 | P | G | X |  |  |  |  | NR |  | X | X |  | X | 63 | - |  |  |  |  |  |  |
| Lisansky 1996 49 | C | - | 8 | SM | H | 8 | 8 | 1 | 90 | N, P | G | X |  |  | X |  | NR |  |  |  |  |  | 8 | - |  |  |  |  |  |  |
| Luk 2017 35 | CCT | 3 | 8 | SM | H | 14 | 6 | NR | NR | P | G | X |  |  |  |  | NR |  | X | X |  |  | 38 | H | 14 | X | X |  |  | 32 |
| Williams 2015 36 | CCT | 4 | 8 | B | H | 12 | 8 | 1 | 60 | P | G | X |  |  | X |  | NR |  | X | X |  |  | 39 | H | 58 | X | X |  |  | 31 |
| #Eiser 1997 37 | CCT | 3 | 6 | A | H | 10 | 6 | 1 | 90 | P | G | X |  |  |  | X | NR |  |  |  |  |  | 6 | UC | 8 |  |  |  | X | 7 |
| #Pumer 2019 38 | RCT | 6 | 8 | SM | H | 24 | 6 | 1 | ≤60 | P | I+G | X | X |  | X |  | NR |  | X | X | X |  | 38 | H | 41 | X | X | X | X | 36 |
| Farver-Ve 2018 39 | RCT | 7 | 8 | A+D | H | 39 | 9 | 1 | ≤60 I +105 G | CP | I+G | X | X |  | X | X | 4.0 [2.7] |  | X | X |  |  | 33 | H | 45 | X | X |  |  | 24 |
| #Heslop-M 2018 40 | RCT | 8 | 4-12 | A | H | 139 | 2-6 | 0.5 | 30 | N | I | X |  |  | X |  | 4.0 [NR] |  | X |  |  |  | 2-6 | L | 140 | * |  | X |  | 0 |
| #Cully 2017 41 | RCT | 7 | 16 | A+D | H | 180 | ≤ 6 | ≤1 | 30-45 | P, SW | I | X | X |  | X |  | 3.9 [2.3] | X |  |  |  |  | ≤ 6 | EUC | 122 |  |  |  | X | 1 |
| #Doyle 2017 42 | RCT | 8 | 8 | A+D | H | 54 | 8 | 1 | 30 | P | I |  | X |  | X |  | NR |  |  |  | X |  | 9 | H | 56 | * |  |  | X | 9 |
| #Bove 2016 43 | RCT | 7 | 3 | A | H | 32 | 1 | ≤1 | 60 | N | I | X | X |  | X |  | 100% | X | X |  |  |  | 2 | UC | 33 | * |  |  |  | - |
| Lee 2015 44 | RCT | 4 | 24 | SM | H | 78 | 12 | 0.5 | 60 initial: 30 | N | I |  | X |  |  |  | NR |  |  |  |  |  | 12 | UC | 73 |  |  |  |  | - |
| # Howard 2014 45 | RCT | 6 | 5 | B | L | 112 | 3 | ≤ 0.5 | 60 initial: 30 | P | I | X | X |  | X |  | NR | X |  |  |  | X | 3 | L | 110 |  |  | X | X | 3 |
| Walters 2013 46 | RCT | 6 | 52 | SM | H | 74 | 16 | ≤ 0.5 | 30 | N | I |  | X |  |  |  | Med 9.5 |  |  |  |  |  | 16 | EUC | 80 |  |  |  | X | 12 |
| Jiang 2012 22 | RCT | 6 | 40 | A+D | L | 49 | 14 | ≤ 0.5 | 35 | N | I |  | X |  | X | X | NR |  |  |  |  |  | NR | UC | 47 |  |  |  |  | - |
| #Jonkers 2012 47 | RCT | 5 | 12 | A+D | H | 183 | 2-10 | ≤1 | Med 60 | N | I | X |  |  | X |  | 4 [NR] |  |  |  |  |  | ≤10 | UC | 178 |  |  |  |  | - |
| Kapella 2011 21 | RCT | 6 | 6 | I | H | 9 | 6 | 1 | 60 | N | I | X |  |  |  |  | 100% |  |  |  | X |  | 6 | H | 9 |  |  |  | X | 6 |
| # Lamers 2010 20 | RCT | 6 | ≤12 | A+D | H | 96 | 2-10 | ≤1 | 60 | N | I | X |  |  |  |  | 4 [NR] |  |  |  | X |  | ≤10 | UC | 91 |  |  |  |  | - |
| Livermore 2010 19 | RCT | 7 | 4 | A+D | H | 21 | 4 | 1 | 60 | CP | I | X |  |  | X |  | NR |  |  |  |  |  | 4 | UC | 20 | * |  |  |  | - |
| # Hynninen 201018 | RCT | 6 | 7 | A+D | H | 25 | 7 | 1 | 120 | P | G | X | X |  | X |  | NR | X |  |  |  |  | 7 | EUC | 26 |  |  |  | X | 3 |
| # Kunik 2008 17 | RCT | 6 | 8 | A+D | H | 118 | 8 | 1 | 60 | P | G | X |  |  |  |  | ≥75% |  |  |  |  |  |  | H | 120 |  |  |  |  | 8 |
| Blumenthal 2006 48 | RCT | 6 | 12 | SM | H | 166 | 12 | 1 | 30 | CP, SW | I |  | X |  | X |  | 88.3% |  |  |  |  |  | 12 | UC | 162 |  |  |  |  | - |
| De Godoy 2005 16 | RCT | 6 | 12 | A+D | H1 | 19 | 12 | 1 | NR | P | I | X |  |  |  |  | NR |  | X | X |  | X | 63 | H | 14 | X | X |  | X | 51 |
| H2 | 16 | 12 | 1 | NR | P | I | X |  |  |  |  | NR |  |  | X |  | X | 39 |
| De Godoy 2003 15 | RCT | 5 | 12 | A+D | H | 14 | 12 | 1 | NR | NR | NR | X |  |  |  |  | NR |  | X | X |  | X | 63 | H | 16 | X | X |  | X | 51 |
| Kunik 2001 14 | RCT | 5 | 1 | A | H | 21 | 1 | 1 | 120 | GPsch | G | X |  |  | X | X | 100% | X |  |  |  |  | 7 | H | 27 |  | X |  | X | 7 |
| Emery 1998 13 | RCT | 6 | 10 | SM | H1 | 25 | 10 | 1 | 60 | CP | G | X |  |  |  |  | ~80% |  | X | X |  |  | 63 | UC | 25 |  |  |  |  | - |
| H2 | 23 | 10 | 1 | 60 | CP | G | X |  |  |  |  | ~88% |  |  | X |  |  | 26 |

**Key:** Design - C =Cohort, CCT – controlled clinical trial, RCT -randomised clinical trial; CBT intervention target = Specific psychological focus -A -Anxiety, B- breathlessness, D-Depression; I-insomnia; SF =Self-management included anxiety, depression, symptoms as part of a broader cognitive/behaviour skill set; Intensity= H -high, L-low, EUC-enhanced usual care, UC-usual care; I = individual, G= group; Facilitator = CP -clinical psychologist, GPsch =geropsychiatrist, P -psychologist, N =nurse, PT = physiotherapist, OT- occupational therapist, SW -social workers; Delivery- FTF =face to face; Phone, Telemed-telemedicine (computer -assisted), manual, audio (tape, compact disc, video); V= varied; Med = Median, NR= Not reported ; # Study eligibility included threshold criterion for anxiety and/or depression ; ‘*’ -pulmonary rehabilitation part of usual care

**Table S3 : Appraisal of methodological quality outcome from PEDro scale**

| First author /year | Design | Eligibility criteria  (Not included in score) | Random allocation | Concealed allocation | Baseline comparability | Blind subjects | Blind therapists | Blind assessors | Adequate follow-up (>85% ) | Intention-to-treat analysis | Between-group comparisons | Point estimates and variability | Pedro  Score/10 |
| --- | --- | --- | --- | --- | --- | --- | --- | --- | --- | --- | --- | --- | --- |
| Luk 2017 | CCT | Y | N | N | Y | N | N | N | N | N | Y | Y | 3 |
| Williams 2015 | CCT | Y | N | N | Y | N | N | Y | N | N | Y | Y | 4 |
| Eiser 1997 | CCT | Y | N | N | N | N | N | N | Y | N | Y | Y | 3 |
| Pumer 2019 | RCT | Y | Y | Y | Y | N | N | N | N | Y | Y | Y | 6 |
| Farver-Vestergaard 2018 | RCT | Y | Y | Y | Y | N | N | Y | N | Y | Y | Y | 7 |
| Heslop-Marshall 2018 | RCT | N | Y | Y | Y | N | N | Y | Y | Y | Y | Y | 8 |
| Cully 2017 | RCT | Y | Y | Y | Y | N | N | Y | N | Y | Y | Y | 7 |
| Doyle 2017 | RCT | Y | Y | Y | Y | N | N | Y | Y | Y | Y | Y | 8 |
| Bove 2016 | RCT | Y | Y | Y | Y | N | N | N | Y | Y | Y | Y | 7 |
| Lee 2015 | RCT | Y | Y | N | Y | N | N | N | N | N | Y | Y | 4 |
| Howard 2014 | RCT | Y | Y | N | Y | N | N | N | Y | Y | Y | Y | 6 |
| Walters 2013 | RCT | Y | Y | Y | Y | N | N | N | N | Y | Y | Y | 6 |
| Jiang 2012 | RCT | Y | Y | N | Y | N | N | Y | Y | N | Y | Y | 6 |
| Jonkers 2012 | RCT | Y | Y | N | Y | N | N | N | N | Y | Y | Y | 5 |
| Kapella 2011 | RCT | Y | Y | N | Y | N | N | N | Y | Y | Y | Y | 6 |
| Lamers 2010 | RCT | Y | Y | Y | Y | N | N | N | N | Y | Y | Y | 6 |
| Livermore 2010 | RCT | Y | Y | Y | Y | N | N | N | Y | Y | Y | Y | 7 |
| Hynninen 2010 | RCT | Y | Y | Y | Y | N | N | N | N | Y | Y | Y | 6 |
| Kunik 2008 | RCT | Y | Y | N | Y | N | N | Y | N | Y | Y | Y | 6 |
| Blumenthal 2006 | RCT | Y | Y | Y | Y | N | N | N | N | Y | Y | Y | 6 |
| De Godoy 2005 | RCT | Y | Y | N | Y | N | N | Y | Y | N | Y | Y | 6 |
| De Godoy 2003 | RCT | Y | Y | N | Y | N | N | N | Y | N | Y | Y | 5 |
| Kunik 2001 | RCT | Y | Y | N | Y | N | N | N | Y | N | Y | Y | 5 |
| Emery 1998 | RCT | Y | Y | Y | Y | N | N | N | Y | N | Y | Y | 6 |

Key- Shaded rows indicate scoring as reported in Physiotherapy Evidence Database (<https://www.pedro.org.au/>)

All other scores rated independently by two authors (MTW/KNJ or MTW/CP) with disagreements resolved by consensus.

**Sensitivity Analysis**

There were three controlled clinical trials (CCTs) included within the review (Luk et al 2017, Williams et al 2015 (both High resource vs High resource) and Eiser et al 1997 (High resource versus Enhanced/Usual care). Luk et al (2017) was not included in the original meta-analysis (did not report sufficient data) and neither Eiser et al (1997) or Williams et al (2015) reported an outcome for Depression (analysis not rerun). Eiser et al (1997) contributed data for Anxiety and Dyspnea in the original model. Eiser et al (1997) and Williams et al (2015) contributed data for Exercise capacity, Quality of life -Mental and Quality of life -Physical in the original models (note these studies were in different resource dyads).Models were rerun for the appropriate health domains excluding Eiser et al (1997) and Williams et al (2015).

**Table S4**: Overview of original (RCTs + CCTs) and revised (sensitivity -RCTs only) meta-analysis.

|  | Anxiety | | Dyspnea | | Exercise capacity | |
| --- | --- | --- | --- | --- | --- | --- |
| Original  (+ Eiser) | Without CCT  (- Eiser) | Original  (+ Eiser) | Without CCT  (- Eiser) | Original  (+ Eiser, Williams) | Without CCT  (- Eiser, Williams) |
| SMD (95% CI)  Dyad category | -0.251 (-0.44, -0.06) | -0.281 (-0.45, -0.10) | -0.451 (-0.86, -0.05) | -0.441 (-0.89, 0.02) | 0.541 (0.06, 1.03)  0.102 (-0.10, 0.30) | 0.591 (-0.02, 1.20)  0.062 (-0.15, 0.27) |
| SMD (95% CI) Overall | -0.25 (-0.41, -0.09) | -0.27 (-0.43, -0.12) | -0.24 (-0.47, -0.00) | -0.22 (-0.46, 0.02) | 0.16 (-0.02, 0.35) | 0.18 (-0.07, 0.42) |
| Overall Heterogeneity between groups | P=0.000  I2 =70.5% | P=0.000  I2 =69.7% | P=0.061  I2 =70.7% | P= 0.073  I2 =74.5% | P=0.094  I2 =0.00 | P=0.085  I2 =14% |
|  | **Quality of life-Mental Wellbeing** | | **Quality of life-Physical** | |  | |
| Original  (+ Eiser & Williams) | Without CCT  (- Eiser & Williams) | Original  (+ Eiser & Williams) | Without CCT  (- Eiser & Williams) |  | |
| SMD (95% CI)  Dyad category | -0.401 (0.20, 0.61)  0.132 (-0.06, 0.31) | -0.391 (0.17, 0.60)  0.102 (-0.10, 0.30) | 0.311 (0.11, 0.51)  -0.062 (-0.24, 0.13) | 0.291 (0.09, 0.50)  -0.102 (-0.29, 0.09) |  | |
| SMD (95% CI) Overall | 0.28  (0.15, 0.42) | 0.27  (0.13, 0.41) | 0.35  (0.02, 0.69) | 0.33  (-0.02, 0.69) |  | |
| Overall Heterogeneity between groups | P=0.056  I2 =44.8% | P=0.050  I2 =49.6% | P=0.000  I2 = 91.6% | P= 0.000  I2 = 92.5% |  | |

1Dyad =High resource versus Enhanced /Usual care; 2Dyad = High resource versus High resource; SMD =standardised mean difference.

**Findings of sensitivity analysis**

Standardised mean differences (Effect size) and heterogeneity (I2) were essentially unchanged across health outcomes (Dyad and Overall).

- **Anxiety** – essentially unchanged (Dyad SMD and overall SMD)
- **Dyspnoea** – Significant between groups differences no longer present for Dyad category or Overall SMD
- **Exercise Capacity** - Significant between groups differences no longer present for High resource vs Enhanced/Usual care Dyad. No essential change for High resource vs High resource dyad or Overall SMD.
- **Quality of Life -Mental** -unchanged (Dyad SMD and overall SMD)
- **Quality of Life -Physical** – no change dyad SMD. Significant between groups differences no longer present Overall SMD
